# Supplementary material for: Tip60-mediated lipin 1 acetylation and ER translocation determine triacylglycerol synthesis rate
Source: PubMed Central journal article supplement (PMC5953937; doi:10.1038/s41467-018-04363-w), 2018-05-15
Supplement: 41467_2018_4363_MOESM1_ESM.pdf [file 41467_2018_4363_MOESM1_ESM.pdf]

Supplementary Information

**Tip60-mediated lipin 1 acetylation and ER translocation  
determine triacylglycerol synthesis rate**

*Li et al.*

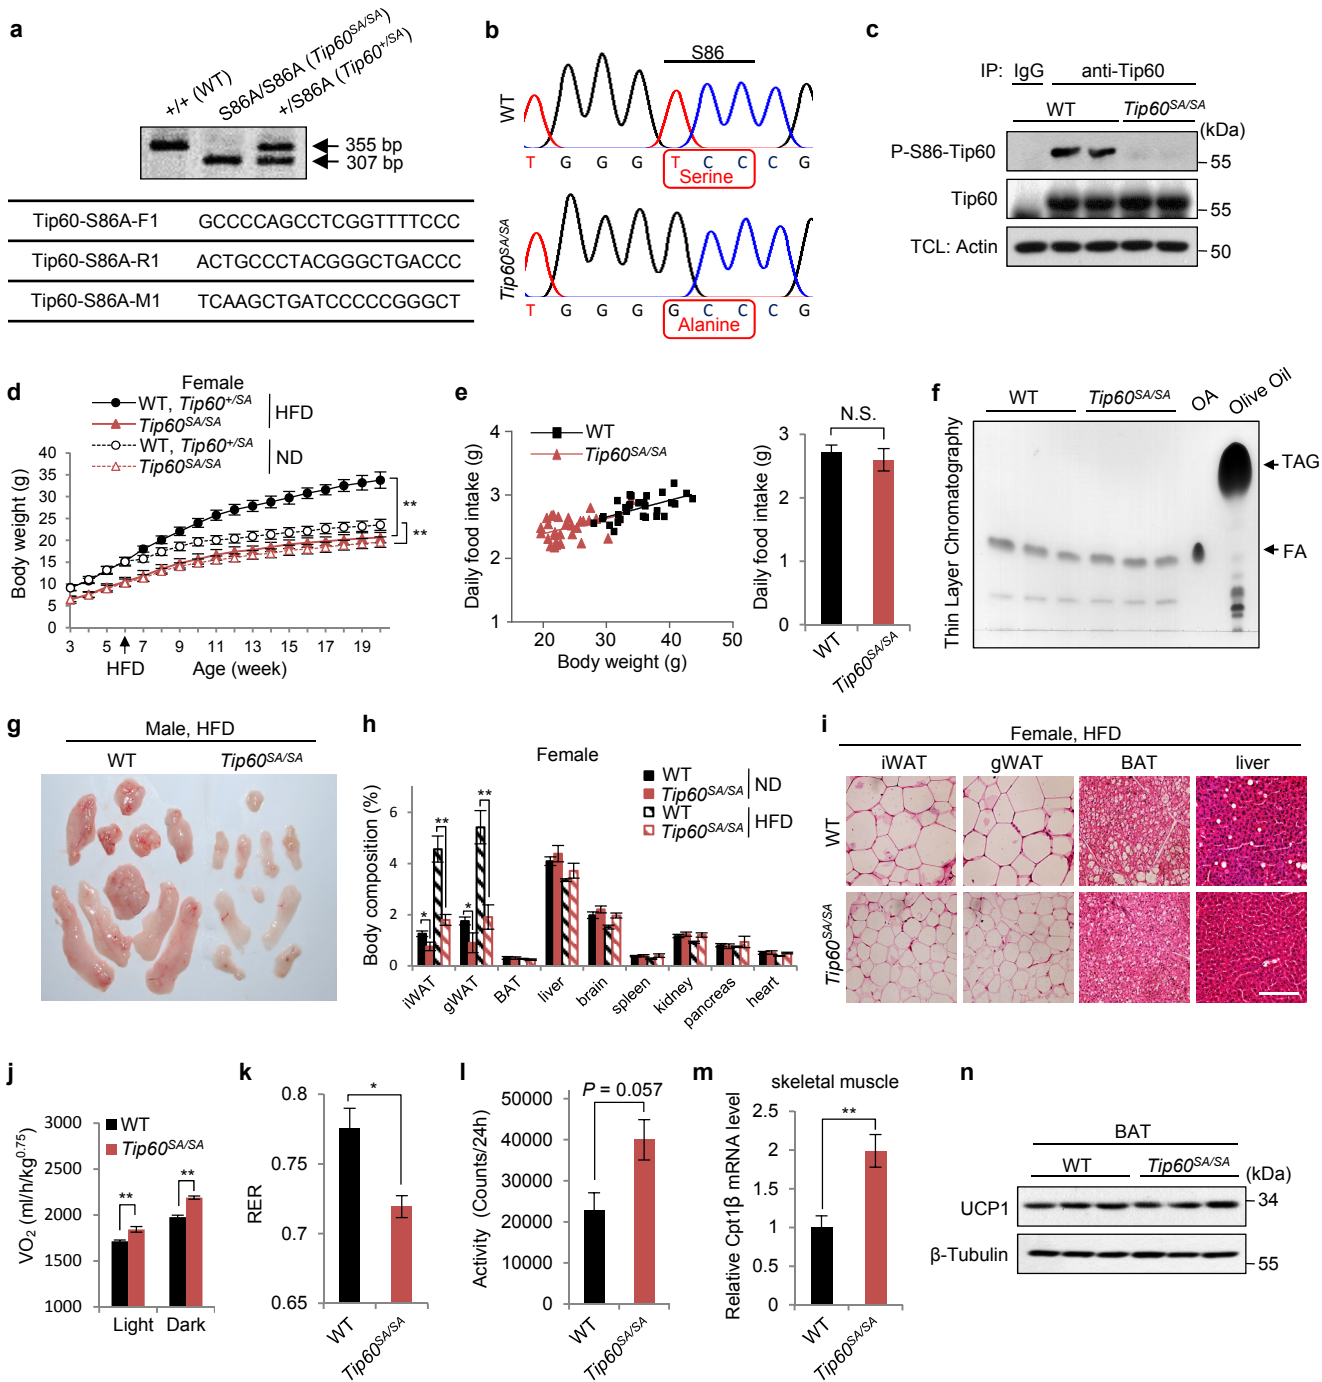

**Supplementary Fig. 1** *Tip60<sup>SA/SA</sup>* mice demonstrate lean phenotypes and are resistant to obesity-associated metabolic disorders. **(a)** PCR analysis of wild-type (WT), heterozygous (*Tip60<sup>+/SA</sup>*) or *Tip60<sup>SA/SA</sup>* knock-in mice and the primers used for genotyping. **(b)** Nucleotide sequencing results of genomic DNA from WT and *Tip60<sup>SA/SA</sup>* mice. **(c)** Equal amounts of cell lysates from WT or *Tip60<sup>SA/SA</sup>* mouse embryonic fibroblasts (MEFs) were immunoprecipitated by antibody to Tip60 and analyzed by immunoblotting as indicated. **(d)** Body weights of female WT, *Tip60<sup>+/SA</sup>* and *Tip60<sup>SA/SA</sup>* mice fed a ND ( $n = 16$  per group) or HFD starting at 6-week age ( $n = 20$  per group). **(e)** Daily food intake of HFD-fed WT and *Tip60<sup>SA/SA</sup>* mice (male,  $n = 25$  per group). Food intake and body weight were collected for 4 consecutive weeks. Squares and triangles correspond to single individuals. Bar graph (right) shows the adjusted means based on a normalized mouse weight of 27.9 g determined by using ANCOVA. **(f)** No evidence of increased fecal fat content in *Tip60<sup>SA/SA</sup>* mice. Total lipids were extracted from fecal collected from WT and *Tip60<sup>SA/SA</sup>* mice fed HFD for one week and separated by thin layer chromatography (TLC). OA, oleic acid; TAG, triacylglycerol; FA, fatty acid. **(g)** Representative photographs of different positions of white adipose tissue (WAT) explants isolated from 18-week old WT and *Tip60<sup>SA/SA</sup>* HFD male mice. **(h)** Percentages of the weights of different tissues from 18-week old WT and *Tip60<sup>SA/SA</sup>* ND or HFD female mice as compared to their corresponding body weights ( $n = 12$  per group). iWAT, inguinal WAT; gWAT, gonadal WAT; BAT, brown adipose tissue. **(i)** Representative sections of iWAT, gWAT, BAT and liver from HFD 18-week old female mice. Scale bar, 50  $\mu\text{m}$ . **(j-m)**  $\text{O}_2$  consumption ( $\text{VO}_2$ ) **(j)**, respiratory exchange ratio (RER) **(k)**, physical activity **(l)**, and gene expression level of *Cpt1 $\beta$*  **(m)** of WT and *Tip60<sup>SA/SA</sup>* mice fed HFD for one week (male,  $n = 6$  per group), before the mice diverge too much in body weight. For  $\text{VO}_2$  data were collected for 3 consecutive days, expressed as adjusted means based on body weight to the power 0.75. **(n)** Similar expression level of *Ucp1* in brown adipose tissue (BAT) of WT and *Tip60<sup>SA/SA</sup>* mice fed HFD for one week (male,  $n = 6$  per group). Error bars denote SEM. Statistical analysis was performed by ANOVA followed by Tukey in **(d, h)** and **(j)**, or by two-tailed unpaired Student's *t*-test in **(k-m)** (\* $P < 0.05$ ; \*\* $P < 0.01$ ; N.S., not significant). Uncropped blots can be found in Supplementary Fig. 6.

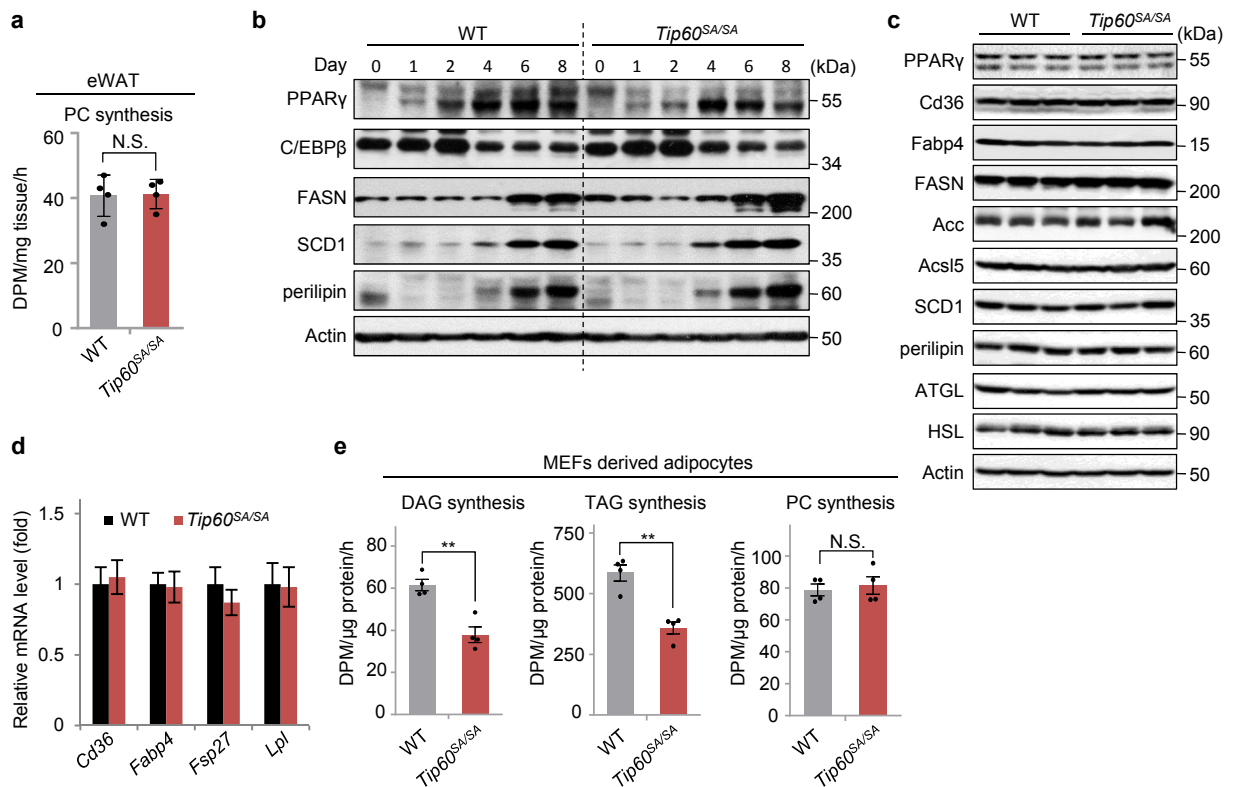

**Supplementary Fig. 2** Roles of Tip60 and its Ser<sup>86</sup> phosphorylation in adipogenesis and lipid synthesis. **(a)** Rates of PC synthesis from <sup>3</sup>H-OA in eWAT explants isolated from 6-week old WT and *Tip60<sup>SA/SA</sup>* mice ( $n = 4$  individuals per group). **(b)** Cell lysates of WT and *Tip60<sup>SA/SA</sup>* MEFs after 0-8 days of adipogenic differentiation induction were analysed by immunoblotting. **(c)** Cell lysates of WT and *Tip60<sup>SA/SA</sup>* stromal vascular fibroblasts (SVFs) after 8 days of adipogenic differentiation induction were analysed by immunoblotting. **(d)** RT-PCR analysis of WT and *Tip60<sup>SA/SA</sup>* SVFs after 8 days of differentiation induction (right,  $n = 8$  mice for each group). **(e)** Rates of DAG, TAG and PC synthesis in WT and *Tip60<sup>SA/SA</sup>* MEFs after 8 days of differentiation ( $n = 4$  experiments). TAG, triacylglycerol, DAG, diacylglycerol, PC, phosphatidylcholine. Error bars denote SEM. Statistical analysis was performed by two-tailed unpaired Student's *t*-test in **(a)** and **(e)** (\*\* $P < 0.01$ ; N.S., not significant). Uncropped blots can be found in Supplementary Fig. 6.

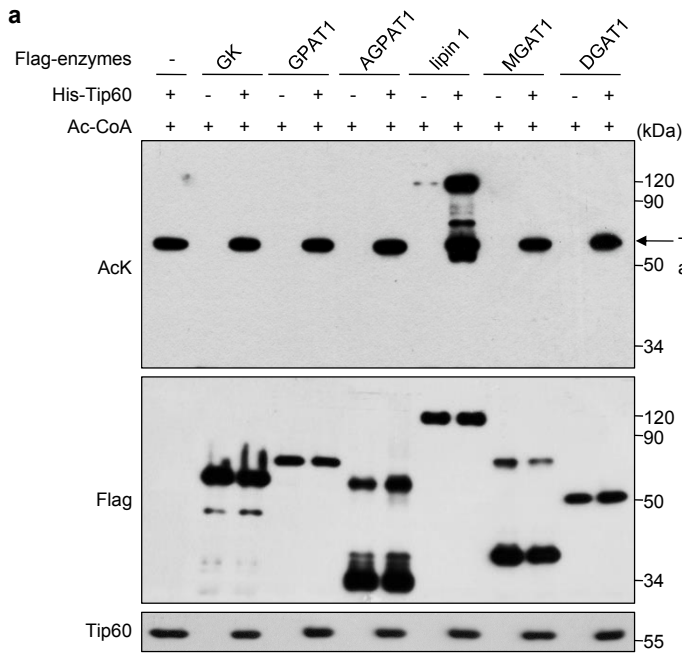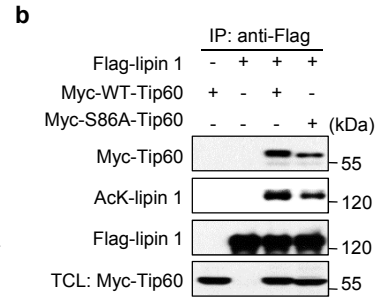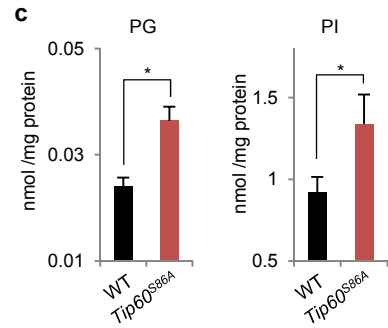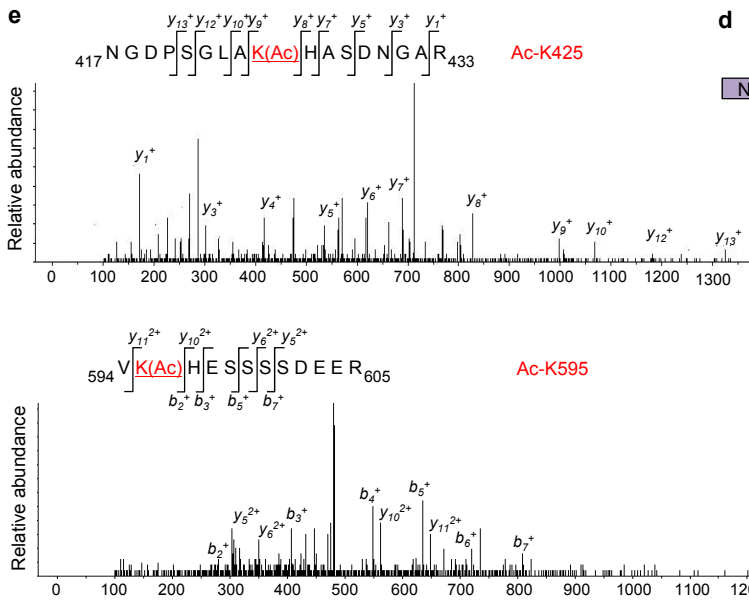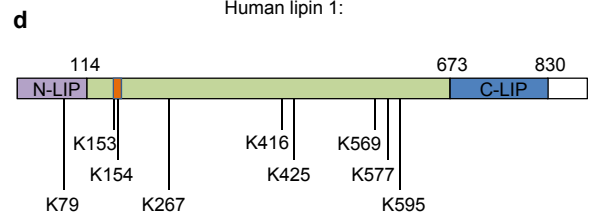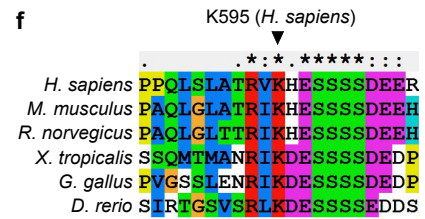

**Supplementary Fig. 3** Identification of Lys<sup>425</sup> and Lys<sup>595</sup> as amino acid sites on lipin 1 acetylated by Tip60. **(a)** Acetylation of lipin 1 by Tip60. Tip60 specifically acetylates lipin 1 but not other enzymes in the TAG synthesis pathway. Immunoprecipitated Flag-tagged enzymes in the TAG biosynthesis pathway were incubated with or without bacterially expressed His-Tip60 in the presence of Ac-CoA and immunoblotted as indicated. **(b)** S86A-Tip60 mutant demonstrates attenuated binding affinity with lipin 1. HEK293T cells were transfected with Flag tagged lipin 1 and Myc tagged WT or S86A mutant of Tip60, immunoprecipitated with antibody to Flag and immunoblotted as indicated. **(c)** Total levels of phosphatidylglycerol (PG) and phosphatidylinositol (PI) normalized to cellular protein in eWAT from 6-week old WT and *Tip60<sup>S86A/S86A</sup>* mice ( $n = 3$  individuals for each group). **(d)** Mass spectrometric analysis for acetylation sites on lipin 1. N-LIP, N-terminus lipin homology domain; C-NLP, C-terminus lipin homology domain. **(e)** Identification of K425 and K595 acetylation on lipin 1 by liquid chromatography-mass spectrometry (LC-MS/MS) analysis. The MS/MS spectrum of the acetylated peptide NGDPSGLAK(Ac)HASDNGAR (top) and VK(Ac)HESSSSDEER (bottom) are shown. The labeled peaks show the masses of  $y$  or  $b$  ions of the acetylated peptides. **(f)** Sequence alignment of the residues flanking Lys<sup>595</sup> across different species. Arrow heads point to Lys<sup>595</sup> residues corresponding to human lipin 1. Error bars denote SEM. Statistical analysis was performed by two-tailed unpaired Student's  $t$ -test in **(b)** ( $*P < 0.05$ ). Uncropped blots can be found in Supplementary Fig. 6.

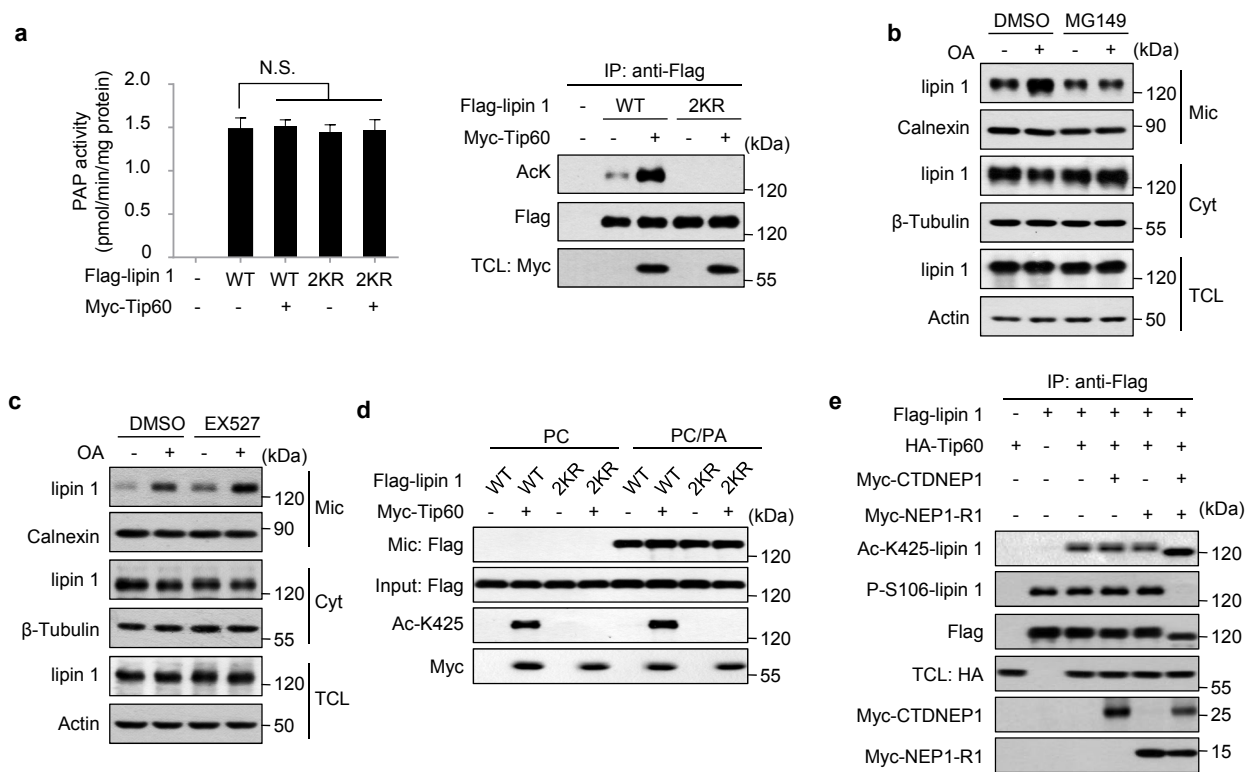

**Supplementary Fig. 4** Regulation of PAP activity and ER localization of lipin 1 by Tip60 or Sirt1 inhibitors. **(a)** Tip60-mediated acetylation of lipin 1 doesn't affect its PAP activity. Flag tagged WT or 2KR-lipin 1 were transfected with or without Tip60 in HEK293 cells, immunopurified with Flag antibody and measured for the  $Mg^{2+}$ -dependent PAP activity (left) ( $n = 4$  experiments). Representative western blots detecting the overexpressed proteins are shown (right). **(b)** Tip60 inhibitor MG149 blocks the ER localization of lipin 1. 3T3-L1 adipocytes were pretreated with DMSO or MG149 for 3 h and co-treated with BSA or OA for 3 h and analyzed by fractionation, followed by western blotting. **(c)** Sirt1 inhibitor EX527 promotes lipin 1 ER localization. 3T3-L1 adipocytes (differentiation day 8) were pretreated with DMSO or EX527 for 3 h and co-treated with or without OA for 3 h, analyzed by fractionation, followed by western blotting. **(d)** Binding of lipin 1 with artificial liposomes. Immuno-purified Flag-tagged WT-lipin 1 or 2KR mutant co-expressed with or without Tip60 in HEK293T cells were incubated with liposomes consist of phosphatidylcholine (PC) or PC with 20 mol% of phosphatidic acid (PA) (PC/PA) for 20 min. The lipin 1 protein binds with liposomes (mic) were purified by ultracentrifuge and analysed by western blotting. **(e)** Co-expression of CTDNEP1 and NEP1-R1 with lipin 1 leads to lipin 1 dephosphorylation and promotes its acetylation by Tip60. HEK293T cells were transfected with lipin 1, Tip60, CTDNEP1 and/or NEP1-R1, immunoprecipitated with antibody to Flag and immunoblotted as indicated. Error bars denote SEM. Statistical analysis was performed by ANOVA followed by Tukey in **(a)** (N.S., not significant). Uncropped blots can be found in Supplementary Fig. 6.

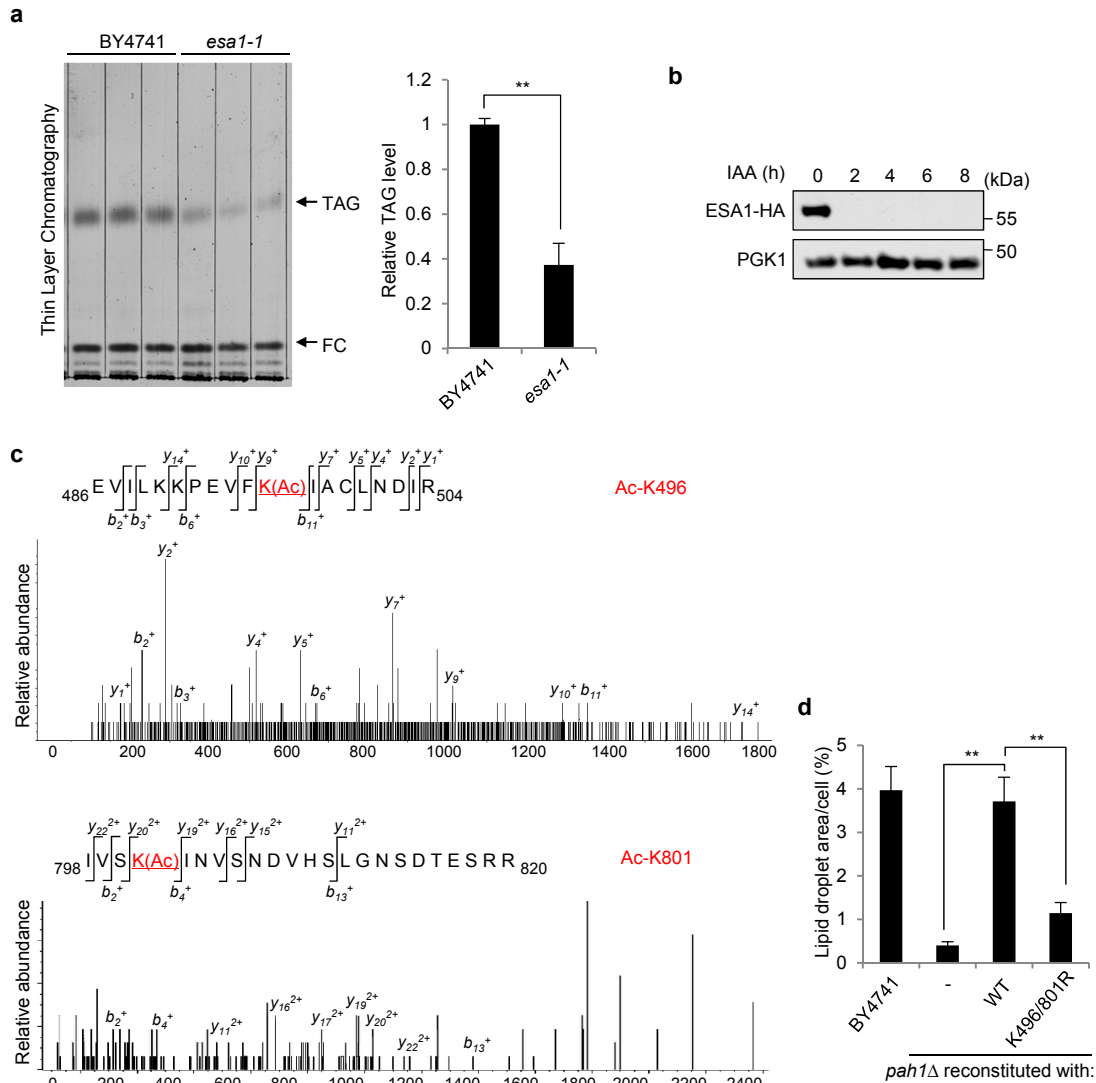

**Supplementary Fig. 5 Role of ESA1 (Yeast Tip60) in TAG accumulation in *S. cerevisiae* and PAH1 (Yeast Lipin 1) acetylation by ESA1.** (a) Impaired accumulation of TAG in *ESA1* loss of function mutant (*esa1-1*, an auxin-sensitive mutant strain of *ESA1*). TAG were extracted from cells grown in synthetic complete (SC) medium, separated by thin TLC, stained by iodine vapor and quantified. FC, free cholesterol ( $n = 3$  experiments). (b) Rapid depletion of *ESA1* by auxin indole-3-acetic acid (IAA) treatment in the auxin-sensitive mutant strain of *ESA1*. Cells grown in SC medium were collected for analysis at indicated time points after addition of 500  $\mu$ M IAA. (c) Identification of K496 and K801 acetylation on PAH1 by liquid chromatography-mass spectrometry (LC-MS/MS) analysis. The MS/MS spectrum of the acetylated peptide EVILKKPEVFK(Ac)IACLNDIR (top) and IVSK(Ac)INVSNDVHSLGNSDTESTR (bottom) are shown. The labeled peaks show the masses of  $y$  or  $b$  ions of the acetylated peptides. (d) Percentage of lipid droplet area in WT (BY4741) or PAH1 knockout (*pah1Δ*) cells reconstituted with vector, WT-PAH1 or K496/801R-PAH1 ( $n = 100$  cells quantified for each group). Error bars denote SEM. Statistical analysis was performed by two-tailed unpaired Student's  $t$ -test in (a) or by ANOVA followed by Tukey in (d), (\*\* $P < 0.01$ ). Uncropped blots can be found in Supplementary Fig. 6.



**Supplementary Figure 6** Uncropped blots with size marker indications.

Figure 2e

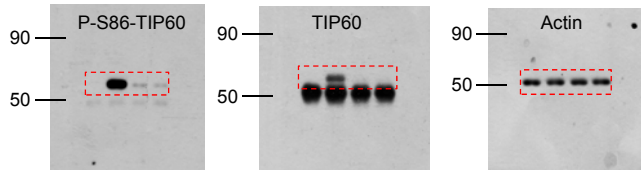

Figure 3b

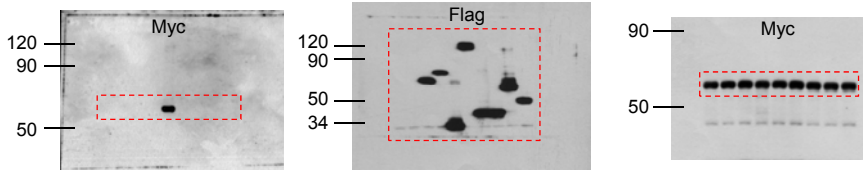

Figure 3c

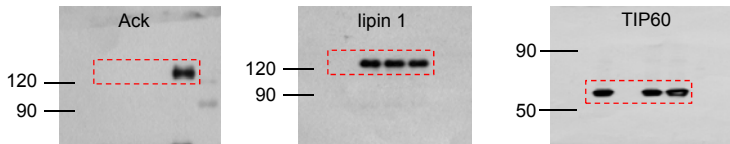

Figure 3d

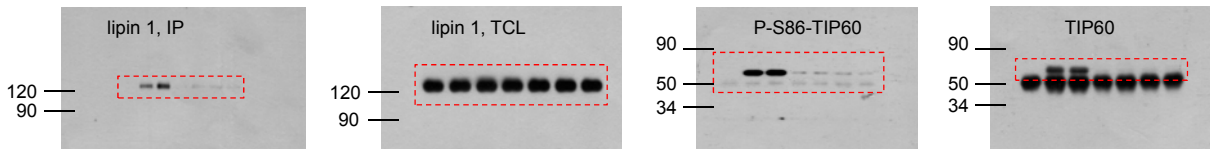

Figure 3e

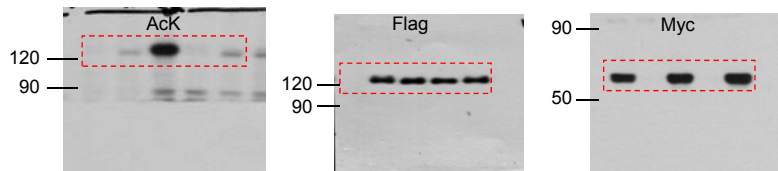

Figure 3f

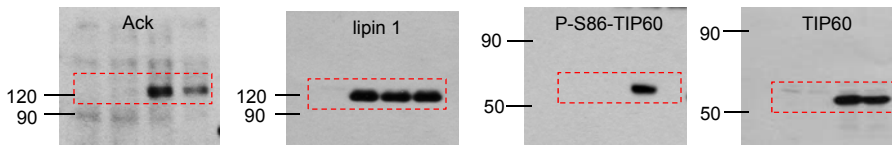

Figure 3g

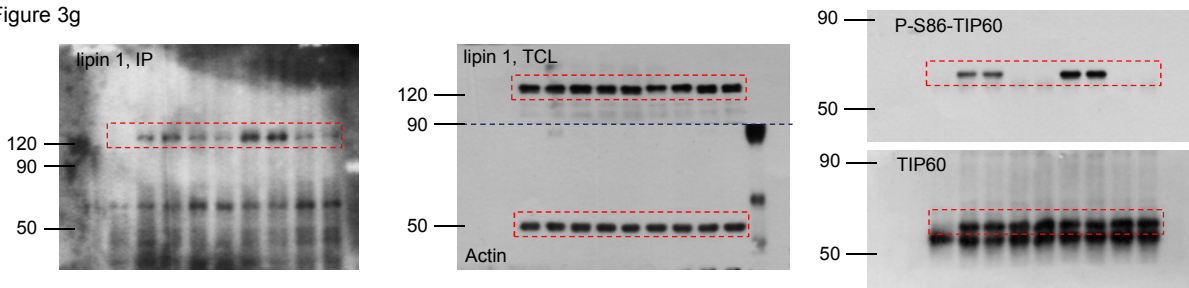

**Supplementary Figure 6** Uncropped blots with size marker indications (continued).

Figure 3k

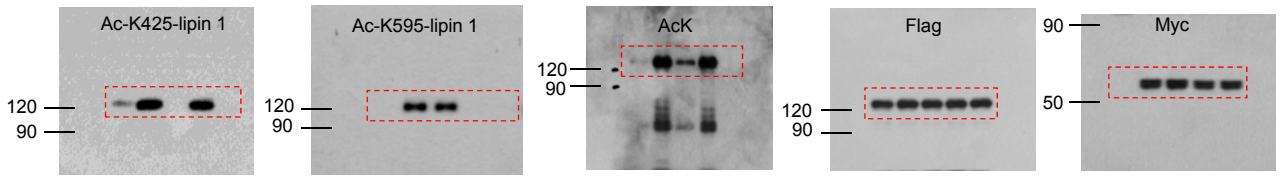

Figure 3l

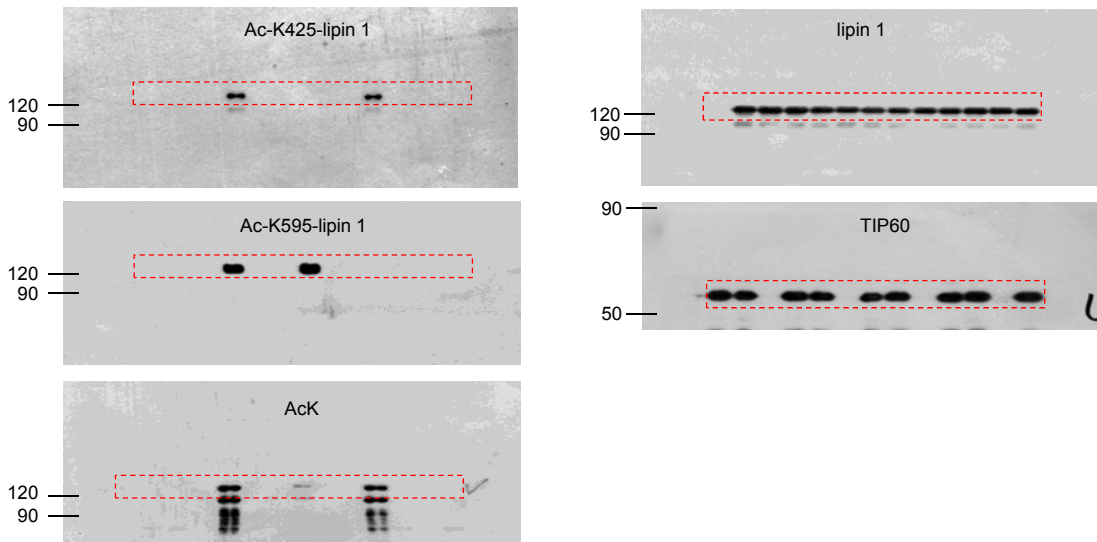

Figure 4a

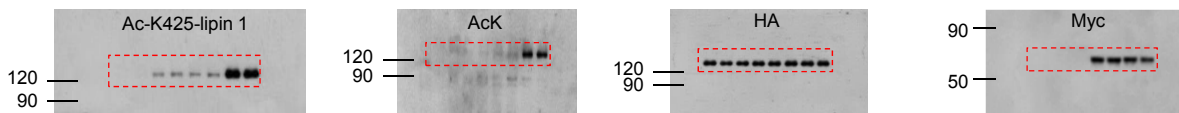

Figure 4b

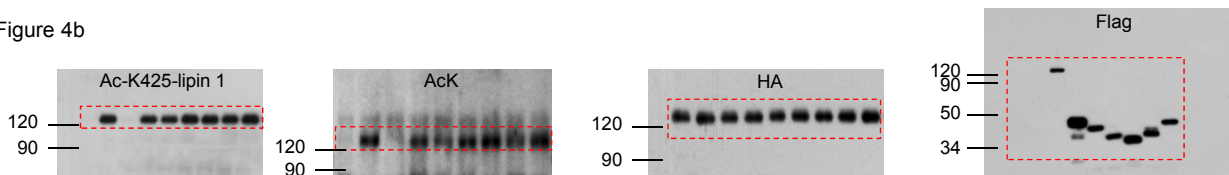

Figure 4c

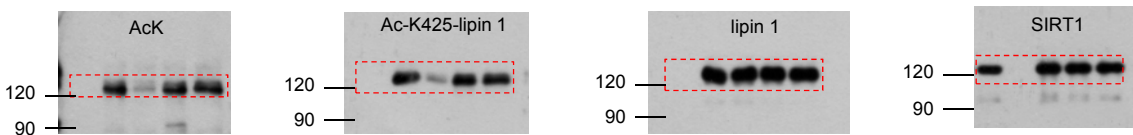

Figure 4d

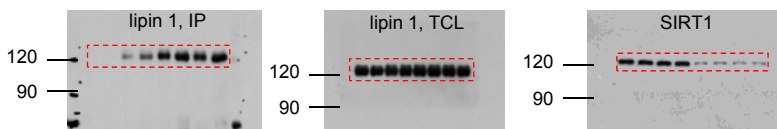

Figure 4e

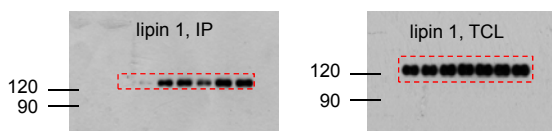

**Supplementary Figure 6** Uncropped blots with size marker indications (continued).

Figure 5b

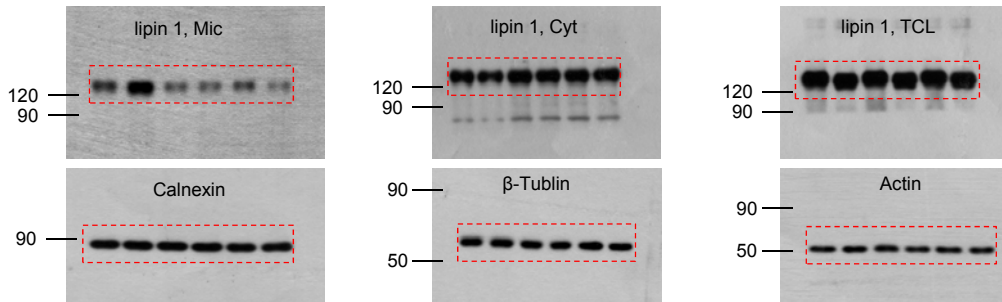

Figure 5c

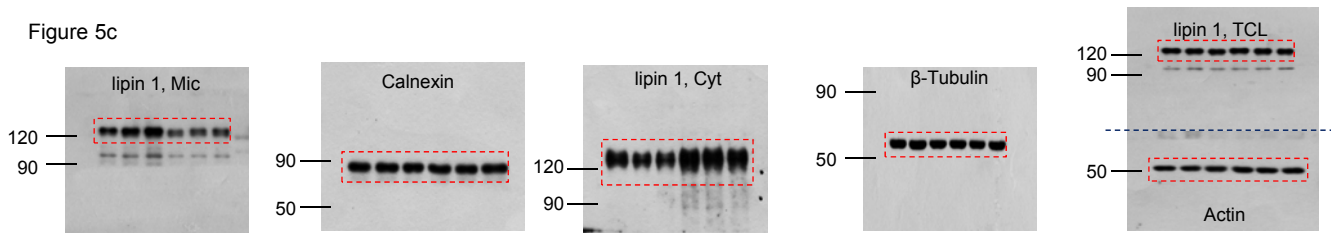

Figure 5d

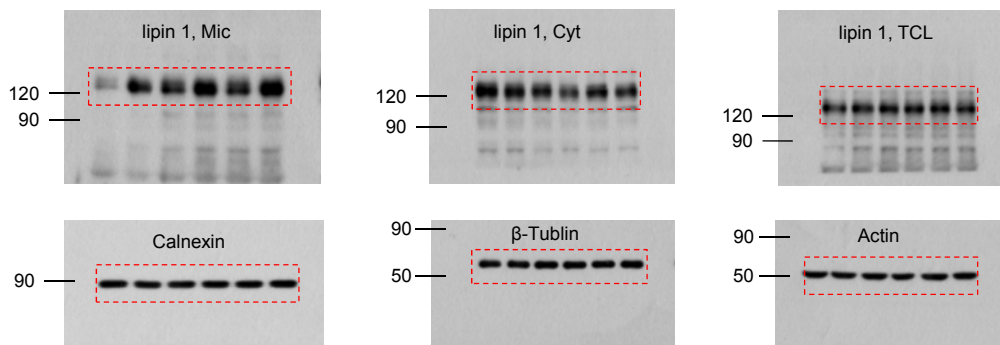

Figure 5e

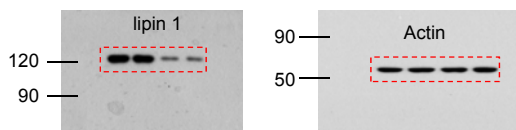

Figure 5f

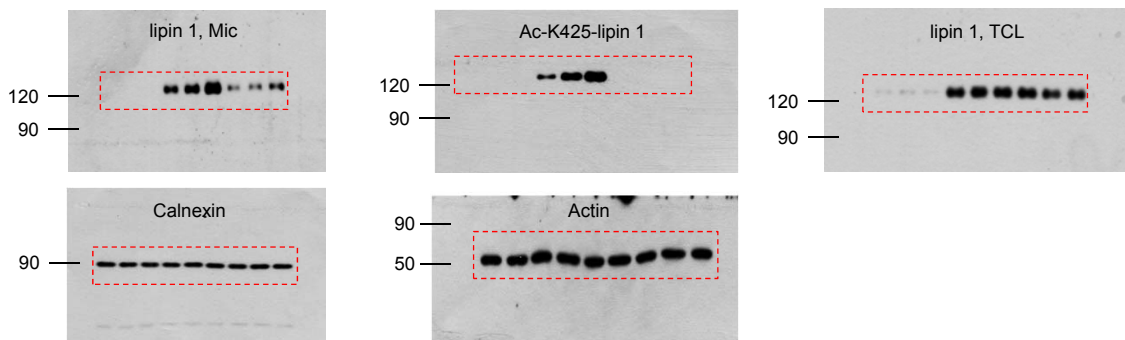

**Supplementary Figure 6** Uncropped blots with size marker indications (continued).

Figure 6a

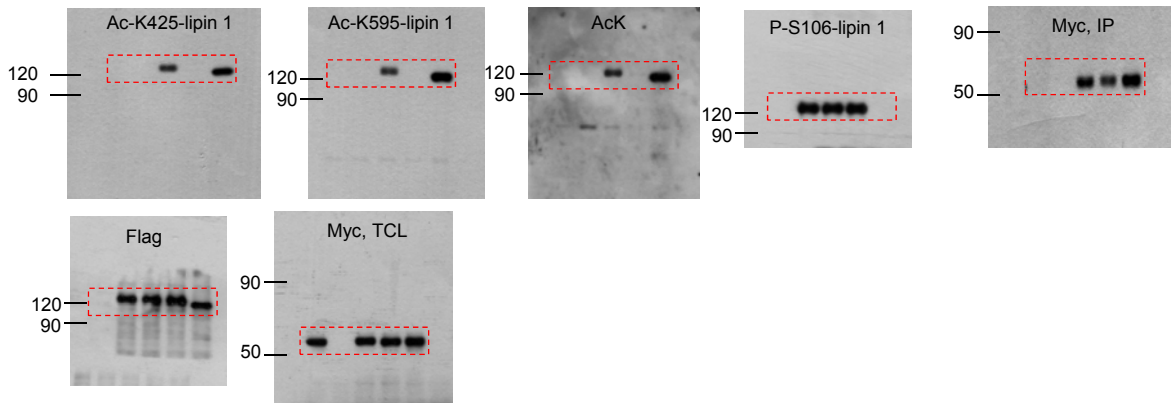

Figure 6b

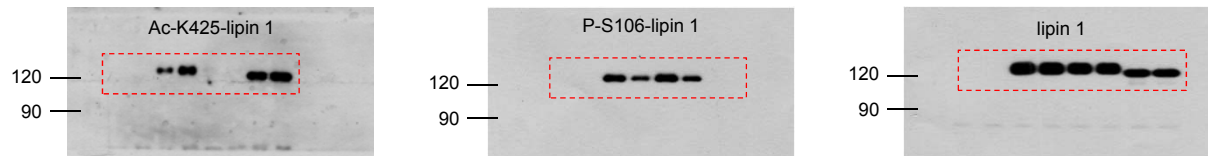

Figure 6c

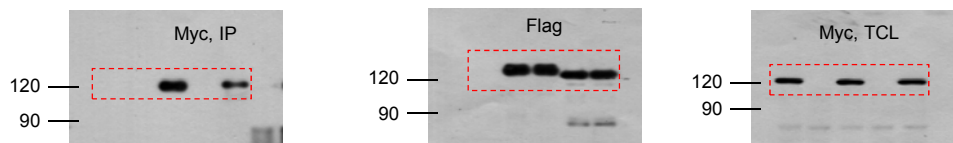

Figure 6d

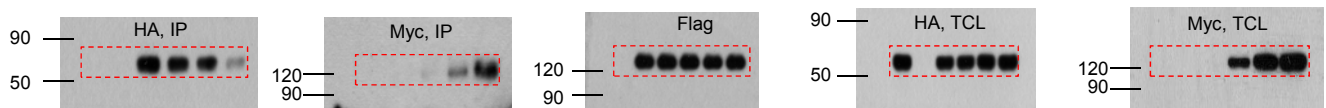

Figure 6e

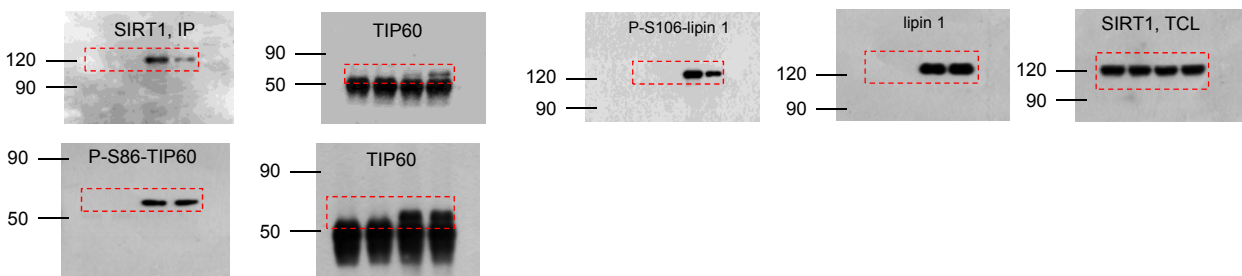

Figure 7e

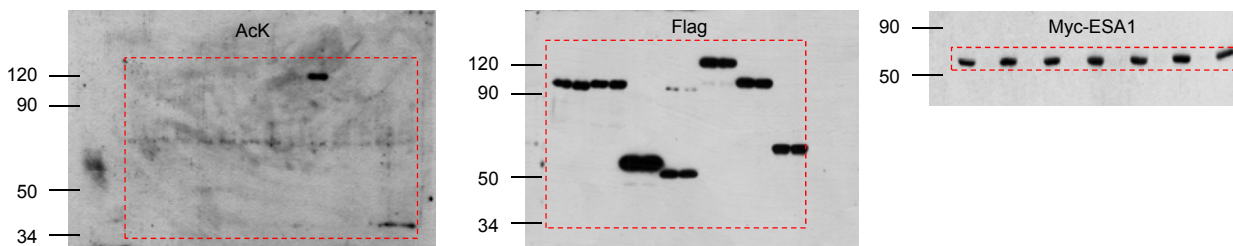

**Supplementary Figure 6** Uncropped blots with size marker indications (continued).

Figure 7f

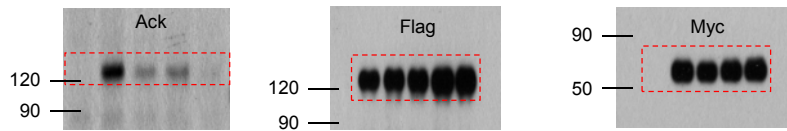

Figure 7g

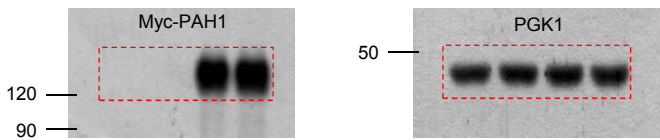

Supplementary Figure 1c

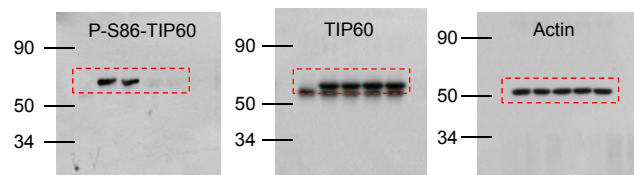

Supplementary Figure 1n

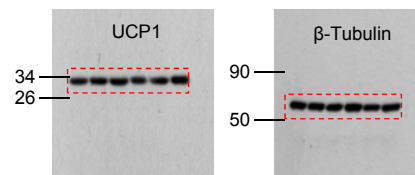

Supplementary Figure 2b

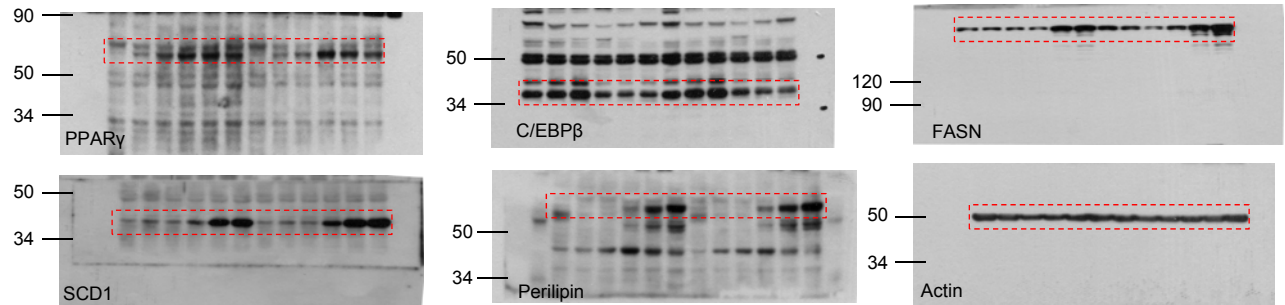

Supplementary Figure 2c

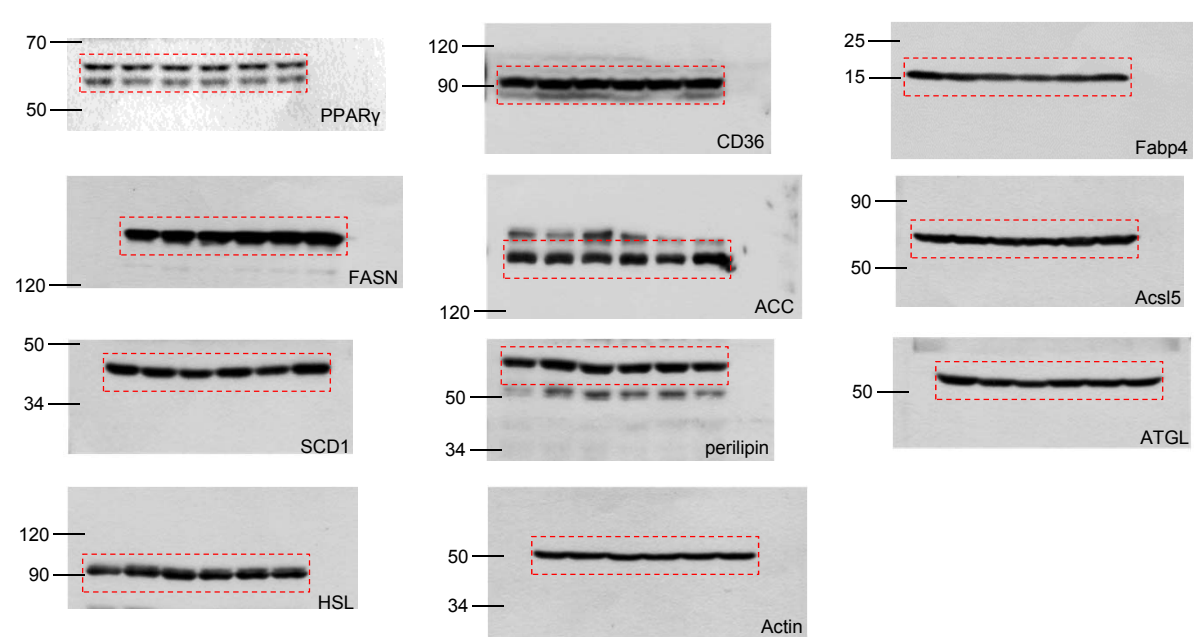

**Supplementary Figure 6** Uncropped blots with size marker indications (continued).

Supplementary Figure 3a

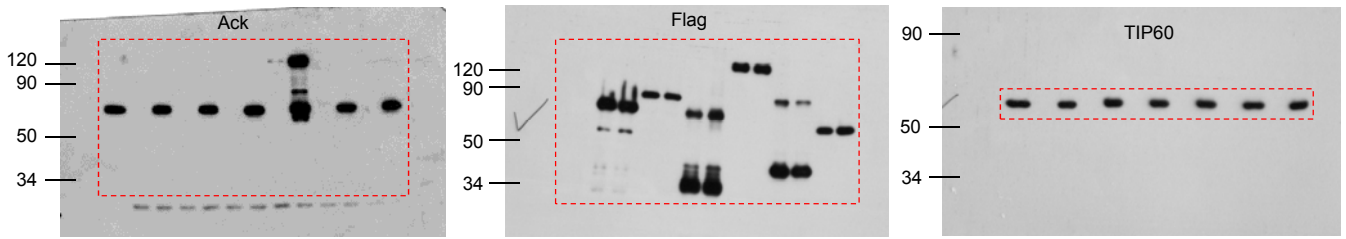

Supplementary Figure 3b

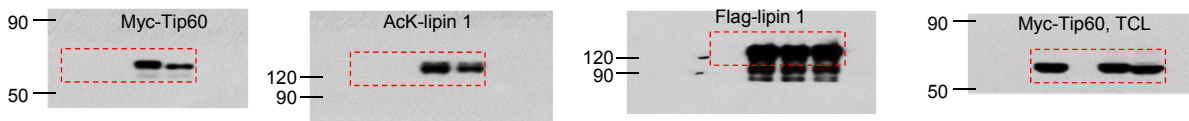

Supplementary Figure 4a

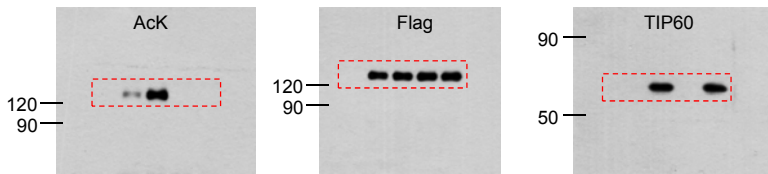

Supplementary Figure 4b

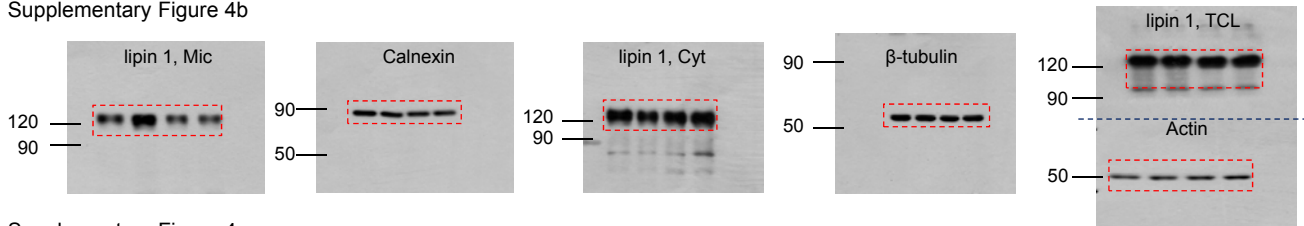

Supplementary Figure 4c

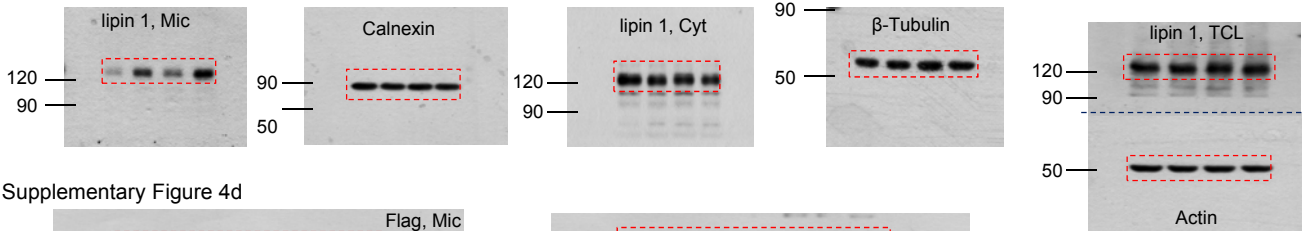

Supplementary Figure 4d

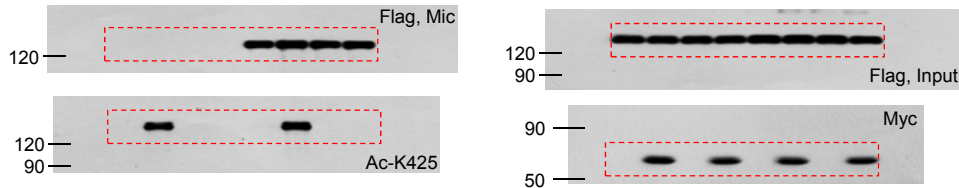

Supplementary Figure 4e

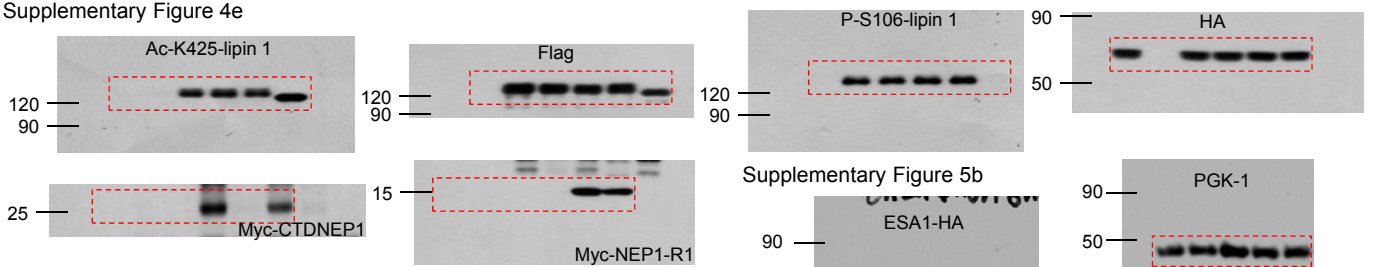

Supplementary Figure 5b

**Supplementary Table S1** Lipidomic Profiling of WT and *Tip60<sup>SA/SA</sup>* Mice eWAT by LC-MS.

|                    | WT-1       | WT-2       | WT-3       | S86A-1     | S86A-2     | S86A-3     | WT-mean    | S86A-mean  | fold change (S86A/WT) | P-values |
|--------------------|------------|------------|------------|------------|------------|------------|------------|------------|-----------------------|----------|
| DAG34:3(18:2/16:1) | 2.69600157 | 2.98579008 | 2.94658427 | 1.86371023 | 2.46053859 | 2.43990354 | 2.87612531 | 2.25471745 | 0.7839427             | 0.0495   |
| DAG36:4(18:2/18:2) | 10.1260838 | 10.1764994 | 11.6386407 | 8.1664648  | 9.59002327 | 8.30241527 | 10.6470746 | 8.68630111 | 0.81583922            | 0.0495   |
| DAG36:3(18:2/18:1) | 12.9123903 | 12.0256068 | 14.44311   | 10.3365188 | 12.38991   | 10.0793701 | 13.1270357 | 10.9352663 | 0.83303394            | 0.1266   |
| DAG34:3(16:2/18:1) | 0.14683384 | 0.12716175 | 0.14717302 | 0.12758368 | 0.1209062  | 0.11305434 | 0.14038954 | 0.12051474 | 0.85843105            | 0.1266   |
| DAG32:2(16:2/16:0) | 0.05039456 | 0.05955278 | 0.05785828 | 0.05134467 | 0.05503613 | 0.04083276 | 0.0559352  | 0.04907119 | 0.87728626            | 0.2752   |
| DAG36:2(18:1/18:1) | 10.2371479 | 9.34761668 | 11.3764287 | 8.94279858 | 8.96579359 | 8.40643043 | 10.3203978 | 8.7716742  | 0.84993567            | 0.1266   |
| DAG34:2(16:1/18:1) | 2.25326634 | 2.2382233  | 2.533602   | 1.70432722 | 2.17728282 | 2.33573726 | 2.34169721 | 2.0724491  | 0.8850201             | 0.2752   |
| GM3 18:0/18:0      | 0.00033346 | 0.00032316 | 0.00011842 | 0.00029621 | 0.00014103 | 0.00027589 | 0.00025835 | 0.00023771 | 0.92012072            | 0.5127   |
| PE38:4p            | 0.06112815 | 0.04810464 | 0.06646267 | 0.05571995 | 0.05401127 | 0.05378806 | 0.05856515 | 0.05450642 | 0.93069722            | 0.5127   |
| DAG32:2(16:1/16:1) | 0.53459385 | 0.60819964 | 0.51648485 | 0.45904273 | 0.41021118 | 0.69588798 | 0.55309278 | 0.52171396 | 0.94326664            | 0.5127   |
| DAG38:4(18:1/20:3) | 0.17188626 | 0.16963364 | 0.17735656 | 0.19837691 | 0.13232093 | 0.16241942 | 0.17295882 | 0.16437242 | 0.95035581            | 0.5127   |
| DAG                | 65.9151289 | 64.8768009 | 66.9346427 | 60.6302128 | 63.5302239 | 63.5996522 | 65.9088575 | 62.5866963 | 0.94959462            | 0.0495   |
| DAG32:1(14:0/18:1) | 0.34410147 | 0.37154682 | 0.35059432 | 0.33027347 | 0.32441336 | 0.3635994  | 0.35541421 | 0.33942874 | 0.955023              | 0.2752   |
| PI 34:1            | 0.02141972 | 0.01464336 | 0.02241084 | 0.02305576 | 0.01516732 | 0.018123   | 0.01949131 | 0.01878202 | 0.96361016            | 0.8273   |
| PS 34:1            | 0.0103786  | 0.00902592 | 0.00868296 | 0.00931238 | 0.00885628 | 0.00892045 | 0.00936249 | 0.0090297  | 0.9644552             | 0.8273   |
| PE34:1p            | 0.0232403  | 0.02413007 | 0.02163804 | 0.02709045 | 0.01756018 | 0.02307818 | 0.0230028  | 0.02257627 | 0.98145749            | 0.8273   |
| DAG32:2(18:2/14:0) | 0.64613084 | 0.78782064 | 0.69426741 | 0.59449606 | 0.61734372 | 0.6777549  | 0.7094063  | 0.66553842 | 0.98186106            | 0.5127   |
| PE36:3p            | 0.02339785 | 0.02474244 | 0.01852521 | 0.02135983 | 0.02080886 | 0.02345857 | 0.02222183 | 0.02187575 | 0.98442597            | 0.8273   |
| PC36:2p            | 0.00397417 | 0.00529339 | 0.00534223 | 0.00539701 | 0.0051523  | 0.00387035 | 0.00486993 | 0.00480656 | 0.98698625            | 0.8273   |
| DAG30:1(14:0/16:1) | 0.08989291 | 0.11325375 | 0.08343669 | 0.07118227 | 0.07582105 | 0.13621815 | 0.09552778 | 0.09440716 | 0.9882691             | 0.5127   |
| PE36:4p            | 0.09168151 | 0.0921776  | 0.0950782  | 0.09403041 | 0.08511005 | 0.09744999 | 0.0929791  | 0.09219682 | 0.99158642            | 0.8273   |
| PI 40:6            | 0.00650364 | 0.00507054 | 0.01269713 | 0.00988526 | 0.00745521 | 0.00682107 | 0.00809043 | 0.00805385 | 0.99547758            | 0.5127   |
| PC32:2             | 0.01042903 | 0.00889433 | 0.02011728 | 0.01357604 | 0.01138376 | 0.01495779 | 0.01314688 | 0.01330586 | 1.01209287            | 0.5127   |
| DAG40:6(18:1/22:5) | 0.18904977 | 0.1608413  | 0.12494203 | 0.18126212 | 0.1381758  | 0.16333117 | 0.1582777  | 0.16092303 | 1.01671322            | 0.8273   |
| GM3 18:1/18:1      | 0.00013349 | 0.00023514 | 6.7256E-05 | 4.9519E-05 | 0.00024567 | 0.00015351 | 0.0001453  | 0.00014956 | 1.02936812            | 0.8273   |
| LPA18:1            | 0.04904401 | 0.04654232 | 0.06346141 | 0.06986236 | 0.04946468 | 0.04514659 | 0.05301592 | 0.05482454 | 1.03411479            | 0.8273   |
| PE36:4             | 0.10999395 | 0.07825909 | 0.06606623 | 0.10371774 | 0.07042086 | 0.08905456 | 0.08477309 | 0.08773105 | 1.03489271            | 0.8273   |
| GM3 18:1/22:0      | 0.00106696 | 0.00196658 | 0.00062403 | 0.0011338  | 0.00098266 | 0.00171167 | 0.00121919 | 0.00127604 | 1.04663257            | 0.8273   |
| DAG34:1(16:1/18:0) | 0.22991668 | 0.20087242 | 0.1937095  | 0.18904151 | 0.19701993 | 0.27029593 | 0.2081662  | 0.21878579 | 1.05101495            | 0.8273   |
| PC40:5             | 0.01189307 | 0.01274124 | 0.02202173 | 0.02333288 | 0.01058309 | 0.0152403  | 0.01555201 | 0.01638543 | 1.05358867            | 0.8273   |
| PI 36:1            | 0.01109958 | 0.00867773 | 0.01542865 | 0.01712751 | 0.00967335 | 0.01070001 | 0.01173532 | 0.01250029 | 1.06518563            | 0.8273   |
| GM3 18:0/22:0      | 0.00036752 | 0.00055741 | 0.0002699  | 0.00068918 | 0.00035091 | 0.00024477 | 0.00039828 | 0.00042829 | 1.07535122            | 0.8273   |
| DAG34:1(16:0/18:1) | 6.23308958 | 5.92479521 | 5.35644496 | 6.36121595 | 6.00625367 | 6.52835428 | 5.83810992 | 6.29860797 | 1.07887793            | 0.1266   |
| PE40:4p            | 0.07799852 | 0.08290325 | 0.06282909 | 0.08280374 | 0.08473791 | 0.07552452 | 0.07457695 | 0.08102206 | 1.0864222             | 0.5127   |
| DAG32:1(16:1/16:0) | 0.86588153 | 1.08622292 | 0.83282202 | 0.92215878 | 0.87338113 | 1.2474694  | 0.92830882 | 1.01433644 | 1.09267133            | 0.2752   |
| PE38:6p            | 0.14118468 | 0.15867086 | 0.11567863 | 0.17990586 | 0.13395779 | 0.14645243 | 0.13851139 | 0.15343869 | 1.1077695             | 0.5127   |
| PS 40:7            | 0.03865234 | 0.03445199 | 0.02999675 | 0.05389696 | 0.03300327 | 0.02755974 | 0.03436703 | 0.03815333 | 1.11017242            | 0.8273   |
| CE:18:1            | 0.27916352 | 0.38990964 | 0.30718565 | 0.39488828 | 0.32498712 | 0.3640371  | 0.3254196  | 0.36130417 | 1.11027127            | 0.2752   |
| PI 34:2            | 0.02170286 | 0.01394911 | 0.01492335 | 0.02207264 | 0.01677198 | 0.01760262 | 0.01685844 | 0.01881574 | 1.11610228            | 0.2752   |
| DAG34:2(16:0/18:2) | 12.1858046 | 12.1649974 | 10.7147984 | 12.9008248 | 12.9505898 | 13.6791171 | 11.6885335 | 13.1768439 | 1.12733081            | 0.0495   |
| DAG36:1(18:1/18:0) | 0.92971966 | 1.00450286 | 0.78551744 | 0.99171675 | 0.92327902 | 1.17234921 | 0.90657999 | 1.02911499 | 1.13516182            | 0.5127   |
| DAG36:2(18:2/18:0) | 1.7348532  | 1.86183806 | 1.52727893 | 1.95741566 | 1.7289516  | 2.15409606 | 1.70799006 | 1.94682111 | 1.13983164            | 0.2752   |
| PA34:1             | 0.02051844 | 0.018021   | 0.01596654 | 0.02631283 | 0.01788765 | 0.0179992  | 0.01816866 | 0.02073323 | 1.14115338            | 0.8273   |
| PC34:1             | 0.29730082 | 0.33002332 | 0.32446567 | 0.40637769 | 0.31253223 | 0.36801758 | 0.31726327 | 0.36230917 | 1.14198272            | 0.2752   |
| PE38:5p            | 0.06016842 | 0.06171003 | 0.06037305 | 0.07640937 | 0.06716071 | 0.06559881 | 0.0607505  | 0.06972296 | 1.14769362            | 0.0495   |
| LPE18:1            | 0.03597982 | 0.02739321 | 0.03838407 | 0.0480991  | 0.0308177  | 0.03788274 | 0.03391903 | 0.03893318 | 1.14782705            | 0.5127   |
| PE42:1p            | 0.0109874  | 0.0108332  | 0.00959291 | 0.01322153 | 0.00820899 | 0.01488301 | 0.01047117 | 0.01210451 | 1.15598462            | 0.5127   |
| PC36:4             | 0.15754733 | 0.1514319  | 0.13071968 | 0.20381965 | 0.13664875 | 0.16919402 | 0.1465663  | 0.16988747 | 1.15911687            | 0.2752   |
| PC32:1             | 0.08280728 | 0.09855956 | 0.11638809 | 0.11932923 | 0.1088406  | 0.12039846 | 0.09925164 | 0.11618943 | 1.17065502            | 0.1266   |
| PC38:4             | 0.09778313 | 0.12217969 | 0.11560635 | 0.16452925 | 0.1091851  | 0.11995048 | 0.11185639 | 0.13122161 | 1.17312573            | 0.5127   |
| LPE16:0            | 0.01733326 | 0.01874128 | 0.00875532 | 0.01585485 | 0.01566655 | 0.02172351 | 0.01494329 | 0.0177483  | 1.18771074            | 0.8273   |
| PC38:5             | 0.04803209 | 0.04860675 | 0.0662931  | 0.08451011 | 0.05146331 | 0.05754461 | 0.05431065 | 0.06450601 | 1.18772315            | 0.2752   |
| PC38:3             | 0.06046441 | 0.07295956 | 0.05829457 | 0.09680016 | 0.06305905 | 0.06996376 | 0.06390618 | 0.07660766 | 1.19875197            | 0.2752   |
| CE:18:0            | 0.11753994 | 0.10072028 | 0.05217228 | 0.10740095 | 0.08978682 | 0.12950327 | 0.09014417 | 0.10889701 | 1.20803173            | 0.5127   |
| DAG34:0(16:0/18:0) | 0.64157852 | 0.63076337 | 0.48325407 | 0.73017336 | 0.5670922  | 0.83048755 | 0.58519865 | 0.70925103 | 1.21198337            | 0.2752   |
| DAG38:4(18:0/20:4) | 0.25691075 | 0.25118961 | 0.19121234 | 0.32366406 | 0.25648469 | 0.26788981 | 0.23310423 | 0.28267952 | 1.21267434            | 0.1266   |
| GM3 18:1/18:0      | 0.00060045 | 0.00079333 | 0.00040473 | 0.00093663 | 0.00045604 | 0.00079472 | 0.0005995  | 0.00072913 | 1.21621913            | 0.2752   |
| PE34:1             | 0.07910394 | 0.07701804 | 0.0493598  | 0.08962424 | 0.07117649 | 0.08924905 | 0.06849393 | 0.08334992 | 1.21689512            | 0.2752   |
| PC40:6             | 0.03173789 | 0.04146118 | 0.04230668 | 0.06241112 | 0.03610499 | 0.04306326 | 0.03850191 | 0.04719312 | 1.22573451            | 0.2752   |
| LPI16:1            | 0.00267747 | 0.00237151 | 0.00133006 | 0.00244902 | 0.00240483 | 0.00300775 | 0.00212634 | 0.00262053 | 1.23241205            | 0.2752   |
| PE42:2p            | 0.01018764 | 0.01407858 | 0.00946278 | 0.01211499 | 0.01392789 | 0.01563815 | 0.011243   | 0.01389368 | 1.23576248            | 0.2752   |
| GM3                | 0.00777145 | 0.00960109 | 0.0050603  | 0.01093819 | 0.00768582 | 0.00920113 | 0.00747761 | 0.00927505 | 1.24037563            | 0.5127   |
| PC36:3             | 0.23305945 | 0.26746142 | 0.19901587 | 0.36179311 | 0.24210051 | 0.26425085 | 0.23317891 | 0.28938149 | 1.24020769            | 0.2752   |
| PC38:6             | 0.04570061 | 0.04352616 | 0.0454238  | 0.06889029 | 0.04718164 | 0.05145461 | 0.04488353 | 0.05584218 | 1.24415754            | 0.0495   |
| PC34:3             | 0.02480465 | 0.02997852 | 0.02743743 | 0.04152165 | 0.02593833 | 0.03552366 | 0.02740687 | 0.03432788 | 1.25252846            | 0.2752   |
| PC36:1             | 0.19936475 | 0.27758406 | 0.28597147 | 0.37572139 | 0.26632881 | 0.31601599 | 0.25430676 | 0.3193554  | 1.25578808            | 0.2752   |
| PC32:2e            | 0.00681293 | 0.00723226 | 0.00710754 | 0.00946563 | 0.00807659 | 0.00907129 | 0.00705091 | 0.00887117 | 1.25815923            | 0.0495   |
| PE34:2p            | 0.0178301  | 0.02041843 | 0.0145069  | 0.02664448 | 0.02385715 | 0.01601854 | 0.01758514 | 0.02217339 | 1.26091595            | 0.2752   |
| GM3 18:1/16:0      | 0.00323331 | 0.00355201 | 0.00227666 | 0.00458123 | 0.00326139 | 0.00360587 | 0.00302066 | 0.00381616 | 1.26335283            | 0.1266   |
| CE                 | 0.87459623 | 1.04764967 | 0.90688781 | 1.304008   | 1.01151165 | 1.26852945 | 0.94304457 | 1.19468304 | 1.26683624            | 0.1266   |
| CE:18:2            | 0.23817311 | 0.29529966 | 0.31304777 | 0.40791522 | 0.32658264 | 0.33854421 | 0.28217351 | 0.35768069 | 1.26759132            | 0.0495   |
| PC32:0             | 0.15868396 | 0.19515276 | 0.16287755 | 0.24368702 | 0.19529817 | 0.2193724  | 0.17223809 | 0.21945253 | 1.27412313            | 0.0495   |
| LPS16:0            | 0.00167664 | 0.00158812 | 0.00118861 | 0.00186235 | 0.00148596 | 0.00233148 | 0.00148446 | 0.00189326 | 1.27539006            | 0.2752   |

|                    |            |            |            |            |            |            |            |            |            |        |
|--------------------|------------|------------|------------|------------|------------|------------|------------|------------|------------|--------|
| PS 36:1            | 0.26575004 | 0.28069763 | 0.26121344 | 0.37566097 | 0.3248546  | 0.33347693 | 0.26922037 | 0.34466417 | 1.28023064 | 0.0495 |
| PA38:4             | 0.01742665 | 0.0301587  | 0.01907011 | 0.03198939 | 0.02766613 | 0.02581511 | 0.02221849 | 0.02849021 | 1.28227495 | 0.2752 |
| PE36:1p            | 0.02133501 | 0.01763015 | 0.01632569 | 0.02686254 | 0.02099492 | 0.02307818 | 0.01843028 | 0.02364521 | 1.28295469 | 0.1266 |
| PA36:1             | 0.01018401 | 0.01462002 | 0.01431876 | 0.01870623 | 0.01583423 | 0.01579574 | 0.01304093 | 0.01677873 | 1.28662075 | 0.0495 |
| PC34:0p            | 0.01479149 | 0.01880462 | 0.01721205 | 0.02146402 | 0.02572771 | 0.01818271 | 0.01693605 | 0.02179148 | 1.28669187 | 0.1266 |
| PS 38:4            | 0.16050706 | 0.15008294 | 0.12305863 | 0.23007736 | 0.17472524 | 0.15363543 | 0.14454954 | 0.18614601 | 1.28776617 | 0.1266 |
| PA32:0             | 0.00294368 | 0.00309704 | 0.00228447 | 0.00350725 | 0.00307877 | 0.00415413 | 0.00277506 | 0.00358005 | 1.29007773 | 0.1266 |
| PS 40:4            | 0.03134114 | 0.03187226 | 0.02831646 | 0.04254354 | 0.0371876  | 0.03850973 | 0.03050996 | 0.03941362 | 1.29182817 | 0.0495 |
| PC36:1p            | 0.02525194 | 0.03456481 | 0.03073434 | 0.04276585 | 0.0362443  | 0.03802245 | 0.0301837  | 0.03901086 | 1.29244824 | 0.0495 |
| PE                 | 2.26432032 | 2.15208506 | 1.62000986 | 3.02964008 | 2.26552494 | 2.50953958 | 2.01213842 | 2.60156682 | 1.292937   | 0.0495 |
| PE38:5             | 0.09979917 | 0.07609469 | 0.06179738 | 0.12860178 | 0.09274664 | 0.08600808 | 0.07923041 | 0.10245217 | 1.29309142 | 0.2752 |
| PC36:3p            | 0.0057074  | 0.00517029 | 0.00531904 | 0.00560463 | 0.01023489 | 0.00512024 | 0.00539891 | 0.00698659 | 1.29407329 | 0.8273 |
| PS 38:5            | 0.02078148 | 0.02014173 | 0.01828177 | 0.03354827 | 0.02348908 | 0.01968553 | 0.01973499 | 0.02557429 | 1.29588571 | 0.2752 |
| PC36:0p            | 0.01341699 | 0.01686597 | 0.01347232 | 0.01847453 | 0.0195999  | 0.01870717 | 0.01458509 | 0.0189272  | 1.29770838 | 0.0495 |
| LPA                | 0.31674626 | 0.33266593 | 0.30328472 | 0.52821212 | 0.37551219 | 0.33657932 | 0.31756564 | 0.41343454 | 1.30188691 | 0.0495 |
| LPS18:1            | 0.01142842 | 0.01208017 | 0.01154875 | 0.01524592 | 0.01495176 | 0.01550042 | 0.01168578 | 0.0152327  | 1.30352432 | 0.0495 |
| PS 38:3            | 0.07720206 | 0.07501516 | 0.0652268  | 0.11985092 | 0.08662007 | 0.07877226 | 0.07248134 | 0.09508108 | 1.31180082 | 0.0495 |
| PI 36:4            | 0.10674988 | 0.12364191 | 0.08766514 | 0.18531211 | 0.09855191 | 0.13365965 | 0.10601898 | 0.13917456 | 1.31273254 | 0.2752 |
| PE40:4             | 0.02610773 | 0.03866094 | 0.02591278 | 0.03942351 | 0.03511172 | 0.04463171 | 0.03022715 | 0.03972231 | 1.31412697 | 0.1266 |
| PA38:5             | 0.00437367 | 0.00572669 | 0.00348464 | 0.00579968 | 0.00549828 | 0.00659827 | 0.00452833 | 0.00596541 | 1.31735203 | 0.1266 |
| GM3 18:1/20:0      | 0.00076745 | 0.00055786 | 0.00048896 | 0.00078822 | 0.00063224 | 0.00097794 | 0.00060476 | 0.00079947 | 1.32196228 | 0.1266 |
| PE34:2             | 0.21632291 | 0.19022409 | 0.12772957 | 0.26093265 | 0.19826195 | 0.24829596 | 0.17809219 | 0.23583019 | 1.32420285 | 0.1266 |
| PE34:0             | 0.01273754 | 0.01082158 | 0.01010594 | 0.01696032 | 0.01069069 | 0.01697395 | 0.01122169 | 0.01487499 | 1.3255569  | 0.2752 |
| PC                 | 2.96161219 | 3.67384598 | 2.99950282 | 5.13360384 | 3.57529742 | 4.08410988 | 3.21165366 | 4.26433705 | 1.3277699  | 0.1266 |
| DAG32:0(16:0/16:0) | 2.14730821 | 2.31798293 | 1.50567851 | 2.82752029 | 2.21253409 | 2.88954185 | 1.99032321 | 2.64319874 | 1.32802488 | 0.1266 |
| PS                 | 1.46951122 | 1.51202813 | 1.22851638 | 2.25659442 | 1.74320487 | 1.5965504  | 1.40335191 | 1.8654499  | 1.32928162 | 0.0495 |
| PA32:2             | 0.0030195  | 0.00433362 | 0.00272443 | 0.00459546 | 0.00382058 | 0.00505193 | 0.00335918 | 0.00448933 | 1.33643503 | 0.1266 |
| PE38:6             | 0.12112934 | 0.11660916 | 0.06335176 | 0.17044962 | 0.11869324 | 0.11385469 | 0.10036342 | 0.13433252 | 1.33846095 | 0.5127 |
| PC32:1e            | 0.01243067 | 0.01501847 | 0.0138902  | 0.02096549 | 0.01667536 | 0.01769923 | 0.01377978 | 0.0184467  | 1.33867831 | 0.0495 |
| PS 40:6            | 0.53507993 | 0.5615751  | 0.41339473 | 0.87442963 | 0.5999648  | 0.55647013 | 0.50334992 | 0.67695485 | 1.3448991  | 0.1266 |
| PG36:2             | 0.00326429 | 0.00295394 | 0.00284643 | 0.0037927  | 0.00342389 | 0.0044998  | 0.00302155 | 0.00407153 | 1.34749525 | 0.0495 |
| PI 36:3            | 0.04468254 | 0.04454816 | 0.02903636 | 0.07224171 | 0.04187065 | 0.04529827 | 0.03942235 | 0.05313688 | 1.34788702 | 0.2752 |
| LPE                | 0.13699527 | 0.12468815 | 0.10337245 | 0.19073259 | 0.13744424 | 0.16451627 | 0.12168529 | 0.16423103 | 1.34963755 | 0.0495 |
| PE32:0             | 0.00748249 | 0.00479496 | 0.00505392 | 0.00793022 | 0.00649168 | 0.00897045 | 0.00577712 | 0.00779745 | 1.34971157 | 0.1266 |
| PE38:4             | 0.18751255 | 0.17537765 | 0.13122904 | 0.28559529 | 0.1862404  | 0.19528037 | 0.16470641 | 0.22237202 | 1.35011149 | 0.1266 |
| PE36:3             | 0.18591282 | 0.15945034 | 0.1154202  | 0.25256963 | 0.17440764 | 0.19527178 | 0.15359445 | 0.20741635 | 1.35041559 | 0.1266 |
| LPI20:4            | 0.00573443 | 0.00835278 | 0.00601113 | 0.01086641 | 0.00832719 | 0.00803223 | 0.00669944 | 0.00907528 | 1.35463102 | 0.2752 |
| LPA16:0            | 0.05200857 | 0.0510788  | 0.05309402 | 0.08496336 | 0.06893552 | 0.05781741 | 0.05206046 | 0.07057209 | 1.35557946 | 0.0495 |
| PC34:1p            | 0.00893477 | 0.00994045 | 0.00884951 | 0.01245466 | 0.01232372 | 0.01290136 | 0.00924158 | 0.01255992 | 1.35906633 | 0.0495 |
| PE38:7             | 0.02786019 | 0.02119556 | 0.0136054  | 0.03347164 | 0.02252333 | 0.0293769  | 0.02088705 | 0.02845729 | 1.36243705 | 0.1266 |
| GM3 18:1/20:1      | 0.00053442 | 0.00055864 | 0.0003205  | 0.00103491 | 0.00052711 | 0.00036659 | 0.00047119 | 0.00064287 | 1.36436549 | 0.8273 |
| PC40:7             | 0.01018951 | 0.01705006 | 0.01646896 | 0.02275092 | 0.01580523 | 0.02116624 | 0.01456951 | 0.01990746 | 1.36637837 | 0.2752 |
| PE40:5             | 0.04076001 | 0.04051905 | 0.02824634 | 0.05835235 | 0.04064727 | 0.05091902 | 0.03650847 | 0.04997288 | 1.36880243 | 0.1266 |
| PS 34:2            | 0.01035234 | 0.00830408 | 0.00654447 | 0.0129644  | 0.01141584 | 0.01024231 | 0.0084003  | 0.01154085 | 1.37386182 | 0.1266 |
| PG36:3             | 0.0013367  | 0.00234436 | 0.00104151 | 0.00222171 | 0.0018159  | 0.00245344 | 0.00157419 | 0.00216368 | 1.37447172 | 0.2752 |
| PS 40:5            | 0.13230814 | 0.13308907 | 0.09947614 | 0.21377487 | 0.15109808 | 0.13957855 | 0.12162445 | 0.1681505  | 1.38253862 | 0.0495 |
| LPE16:1            | 0.0091087  | 0.00864656 | 0.00707902 | 0.01132238 | 0.01163436 | 0.0115512  | 0.00827809 | 0.01150265 | 1.38952835 | 0.0495 |
| PI 36:2            | 0.04446829 | 0.03386174 | 0.03126179 | 0.06751556 | 0.03885555 | 0.04599341 | 0.03653061 | 0.05078818 | 1.39029111 | 0.1266 |
| PE32:2             | 0.01226004 | 0.01268438 | 0.00816476 | 0.01651783 | 0.0164123  | 0.01316387 | 0.01103639 | 0.01536467 | 1.3921819  | 0.0495 |
| PE40:6p            | 0.05873822 | 0.05892622 | 0.04754301 | 0.08456417 | 0.06660534 | 0.07895999 | 0.05506915 | 0.07670983 | 1.39297294 | 0.0495 |
| PA                 | 0.1231879  | 0.17595874 | 0.12748246 | 0.22769695 | 0.18911846 | 0.18877378 | 0.1422097  | 0.20186306 | 1.41947461 | 0.0495 |
| PC34:2             | 0.59032488 | 0.75423806 | 0.53848179 | 1.08717398 | 0.71611749 | 0.84385478 | 0.62768158 | 0.88238208 | 1.4057798  | 0.1266 |
| PE40:6             | 0.1279793  | 0.12821491 | 0.08174684 | 0.20610769 | 0.12250876 | 0.14837465 | 0.11264702 | 0.15899703 | 1.41146241 | 0.2752 |
| PA34:2             | 0.00724154 | 0.00657923 | 0.0064628  | 0.0105019  | 0.0070811  | 0.01124221 | 0.00676119 | 0.00960841 | 1.42111205 | 0.1266 |
| PS 36:2            | 0.18715821 | 0.20777202 | 0.1743243  | 0.29053497 | 0.29198989 | 0.22969906 | 0.18975151 | 0.27074131 | 1.42682029 | 0.0495 |
| GM3 18:1/22:1      | 0.00016701 | 0.00029323 | 0.0001181  | 0.00029621 | 0.00031661 | 0.00021449 | 0.00019278 | 0.00027577 | 1.43051629 | 0.1266 |
| PE36:2p            | 0.01798535 | 0.01623829 | 0.01010785 | 0.02752977 | 0.01603733 | 0.02002606 | 0.01477716 | 0.02119772 | 1.43449161 | 0.2752 |
| PE36:1             | 0.06383319 | 0.067739   | 0.05647913 | 0.09733988 | 0.08071078 | 0.0923068  | 0.06268378 | 0.09011915 | 1.43767908 | 0.0495 |
| PG32:1             | 0.00223501 | 0.00173211 | 0.00142369 | 0.00280277 | 0.00263717 | 0.00232711 | 0.00179694 | 0.00258902 | 1.44079427 | 0.0495 |
| LPI16:0            | 0.00231698 | 0.00242256 | 0.0024507  | 0.00321376 | 0.00304743 | 0.00411554 | 0.00239674 | 0.00345891 | 1.44317072 | 0.0495 |
| LPI                | 0.02067908 | 0.02736215 | 0.02021147 | 0.03545484 | 0.03034883 | 0.03278349 | 0.0227509  | 0.03286239 | 1.44444331 | 0.0495 |
| PI                 | 0.93857269 | 1.07317851 | 0.74951777 | 1.70011307 | 1.14636536 | 1.16653551 | 0.92042299 | 1.33767131 | 1.45332236 | 0.0495 |
| PE42:3p            | 0.01003481 | 0.01299761 | 0.01166621 | 0.01873742 | 0.01431434 | 0.01773768 | 0.01156621 | 0.01692981 | 1.46373048 | 0.0495 |
| LPS                | 0.0324314  | 0.03966596 | 0.0326238  | 0.04836003 | 0.04453657 | 0.06045407 | 0.03490705 | 0.05111689 | 1.4643714  | 0.0495 |
| GM3 18:0/16:0      | 0.00033346 | 0.00055819 | 0.00020288 | 0.00068918 | 0.00049133 | 0.00042757 | 0.00036485 | 0.00053603 | 1.46918733 | 0.2752 |
| PI 38:5            | 0.09798749 | 0.11614636 | 0.07304452 | 0.18290292 | 0.11035285 | 0.12926033 | 0.09572612 | 0.1408387  | 1.47126713 | 0.1266 |
| LPE18:0            | 0.04379478 | 0.03640181 | 0.02862398 | 0.06452244 | 0.04244441 | 0.05359835 | 0.03627352 | 0.05352173 | 1.47550419 | 0.1266 |
| CE:16:0            | 0.21420106 | 0.21822721 | 0.21220634 | 0.33956055 | 0.22963181 | 0.38443947 | 0.21487821 | 0.31787728 | 1.47933698 | 0.0495 |
| DAG40:6(18:0/22:6) | 0.29229264 | 0.26188966 | 0.25344776 | 0.39910016 | 0.35686126 | 0.44307581 | 0.26921002 | 0.39967908 | 1.48463671 | 0.0495 |
| PA36:2             | 0.01870611 | 0.02884337 | 0.01780627 | 0.03477414 | 0.02998644 | 0.0332257  | 0.02178525 | 0.03266209 | 1.49927558 | 0.0495 |
| PC36:2             | 0.79328419 | 1.07294896 | 0.71209624 | 1.58707205 | 1.06891251 | 1.21310873 | 0.85944313 | 1.28969776 | 1.50062025 | 0.1266 |
| LPE18:2            | 0.0307786  | 0.03350529 | 0.02053006 | 0.05093383 | 0.03688122 | 0.03976046 | 0.02827132 | 0.04252517 | 1.50418074 | 0.0495 |
| PI 40:5            | 0.0080636  | 0.00798147 | 0.00703073 | 0.01603415 | 0.00984758 | 0.0088906  | 0.00769193 | 0.01159077 | 1.50687422 | 0.0495 |
| PG                 | 0.02458798 | 0.02661361 | 0.021098   | 0.03863817 | 0.03099168 | 0.03945091 | 0.02409986 | 0.03636025 | 1.50873266 | 0.0495 |
| PG34:1             | 0.0090174  | 0.00954836 | 0.00805287 | 0.01584955 | 0.01112773 | 0.01320091 | 0.00887288 | 0.01339273 | 1.50940057 | 0.0495 |
| LPA18:0            | 0.04341539 | 0.09073492 | 0.08233079 | 0.10496996 | 0.10157294 | 0.12030439 | 0.07216037 | 0.1089491  | 1.50981901 | 0.0495 |
| PI 38:4            | 0.48553962 | 0.59461558 | 0.38863741 | 0.92205035 | 0.68001484 | 0.62929279 | 0.48959754 | 0.74378599 | 1.51917    |        |



|                      |            |            |            |            |            |            |            |            |            |        |
|----------------------|------------|------------|------------|------------|------------|------------|------------|------------|------------|--------|
| <b>PA40:6</b>        | 0.03771656 | 0.06295175 | 0.04428388 | 0.0892087  | 0.06667962 | 0.06677138 | 0.0483174  | 0.0742199  | 1.53609061 | 0.0495 |
| <b>PI 38:3</b>       | 0.08533323 | 0.10164676 | 0.06115701 | 0.16467054 | 0.10831176 | 0.1097576  | 0.08271234 | 0.12757997 | 1.54245394 | 0.0495 |
| <b>PE32:1</b>        | 0.01178012 | 0.01422704 | 0.00726126 | 0.02003871 | 0.01316942 | 0.01831256 | 0.01108947 | 0.01717356 | 1.54863641 | 0.1266 |
| <b>PE36:2</b>        | 0.28220949 | 0.2712622  | 0.18679496 | 0.44700164 | 0.34290759 | 0.36404147 | 0.24675555 | 0.38465023 | 1.55883113 | 0.0495 |
| <b>LPS18:0</b>       | 0.01932633 | 0.02599767 | 0.01988643 | 0.03125175 | 0.02809885 | 0.04262203 | 0.02173681 | 0.03399088 | 1.56374714 | 0.0495 |
| <b>PG34:2</b>        | 0.00560016 | 0.00611141 | 0.00478036 | 0.00840407 | 0.00760118 | 0.00990163 | 0.00549731 | 0.00863563 | 1.57088212 | 0.0495 |
| <b>PA32:1</b>        | 0.00105774 | 0.00162744 | 0.00108048 | 0.00230137 | 0.00158553 | 0.00212037 | 0.00125522 | 0.00200242 | 1.59527964 | 0.1266 |
| <b>PE40:5p</b>       | 0.02563737 | 0.02537111 | 0.02189447 | 0.04801097 | 0.03511172 | 0.03376199 | 0.02430098 | 0.03896156 | 1.60329145 | 0.0495 |
| <b>PC36:5</b>        | 0.01688487 | 0.01615809 | 0.01358923 | 0.03371576 | 0.02377929 | 0.0174577  | 0.01554406 | 0.02498425 | 1.60731791 | 0.0495 |
| <b>CE:18:3</b>       | 0.02551849 | 0.04349288 | 0.02227577 | 0.05424284 | 0.04052326 | 0.0520054  | 0.03042905 | 0.04892383 | 1.60780051 | 0.1266 |
| <b>PG36:1</b>        | 0.00190133 | 0.00173322 | 0.00161494 | 0.00283654 | 0.00222727 | 0.00339547 | 0.00174983 | 0.00281976 | 1.61144569 | 0.0495 |
| <b>PG36:4</b>        | 0.00123309 | 0.00219043 | 0.00133827 | 0.00273099 | 0.00215855 | 0.00317436 | 0.00158726 | 0.00268796 | 1.69345761 | 0.1266 |
| <b>GM3 18:0/20:0</b> | 0.00023403 | 0.00020565 | 0.0001687  | 0.00044325 | 0.00028095 | 0.00042799 | 0.00020279 | 0.00038406 | 1.89389051 | 0.0495 |
| <b>PI 40:4</b>       | 0.00502224 | 0.00839567 | 0.00622485 | 0.01724442 | 0.00949235 | 0.01113631 | 0.00654759 | 0.01262436 | 1.92809299 | 0.0495 |

#### lipid name abbreviations

|             |                                       |
|-------------|---------------------------------------|
| <b>CE</b>   | <b>cholesteryl ester</b>              |
| <b>TAG</b>  | <b>triacylglycerol</b>                |
| <b>DAG</b>  | <b>diacylglycerol</b>                 |
| <b>PC</b>   | <b>phosphatidylcholine</b>            |
| <b>PE</b>   | <b>phosphatidylethanolamine</b>       |
| <b>PA</b>   | <b>phosphatidic acid</b>              |
| <b>PS</b>   | <b>phosphatidylserine</b>             |
| <b>PI</b>   | <b>phosphatidylinositol</b>           |
| <b>PG</b>   | <b>phosphatidylglycerol</b>           |
| <b>LBPA</b> | <b>lyso-bisphosphatidic acid</b>      |
| <b>LPA</b>  | <b>lyso-PA</b>                        |
| <b>LPI</b>  | <b>lyso-PI</b>                        |
| <b>LPS</b>  | <b>lyso-PI</b>                        |
| <b>LPE</b>  | <b>lyso-PE</b>                        |
| <b>GM3</b>  | <b>monosialo-dihexosylganglioside</b> |

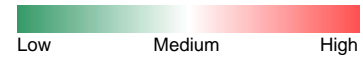

*P* values were calculated by two-tailed unpaired Student's *t*-test comparing lipid species between WT and SA/SA groups. *P* < 0.05 was considered as significant. The significant *P* values are highlighted in pink.

**Supplementary Table 2** Yeast strains used in this study.

| <b>Name</b>                  | <b>Parent</b> | <b>Genotype</b>                                                                                      | <b>Reference</b> |
|------------------------------|---------------|------------------------------------------------------------------------------------------------------|------------------|
| <i>wild-type</i>             | BY4741        | <i>MATa his3Δ1 leu2Δ met15Δ ura3Δ gcn5Δ::kanMX6</i>                                                  | (30)             |
| <i>gcn5Δ</i>                 | BY4741        | <i>MATa his3Δ1 leu2Δ met15Δ ura3Δ elp3Δ::kanMX6</i>                                                  | (30)             |
| <i>elp3Δ</i>                 | BY4741        | <i>MATa his3Δ1 leu2Δ met15Δ ura3Δ hpa2Δ::kanMX6</i>                                                  | (30)             |
| <i>sas2Δ</i>                 | BY4741        | <i>MATa his3Δ1 leu2Δ met15Δ ura3Δ sas2Δ::kanMX6</i>                                                  | (30)             |
| <i>sas3Δ</i>                 | BY4741        | <i>MATa his3Δ1 leu2Δ met15Δ ura3Δ sas3Δ::kanMX6</i>                                                  | (30)             |
| <i>rtt109Δ</i>               | BY4741        | <i>MATa his3Δ1 leu2Δ met15Δ ura3Δ rtt109Δ::kanMX6</i>                                                | (30)             |
| <i>esa1-HA-aid</i>           | BY4741        | <i>MATa his3Δ1 leu2Δ met15Δ ura3Δ ADHI-9XMYC-AtTIR1::HisMX6, esa1-HA-aid::URA3</i>                   | This study       |
| <i>Wild-type-GFP-Faa4</i>    | BY4741        | <i>MATa his3Δ1 leu2Δ met15Δ ura3Δ ADHI-9XMYC-AtTIR1::HisMX6, Faa4-GFP::KanMX6</i>                    | This study       |
| <i>esa1-HA-aid-GFP-Faa4</i>  | BY4741        | <i>MATa his3Δ1 leu2Δ met15Δ ura3Δ ADHI-9XMYC-AtTIR1::HisMX6, esa1-HA-aid::URA3, Faa4-GFP::KanMX6</i> | This study       |
| <i>pah1Δ</i>                 | BY4741        | <i>MATa his3Δ1 leu2Δ met15Δ ura3Δ pah1Δ::URA3</i>                                                    | This study       |
| <i>pah1Δ-vector</i>          | BY4741        | <i>MATa his3Δ1 leu2Δ met15Δ ura3Δ pah1Δ::URA3 pRS316 [vector-HIS3]</i>                               | This study       |
| <i>pah1Δ-WT-PAH1</i>         | BY4741        | <i>MATa his3Δ1 leu2Δ met15Δ ura3Δ pah1Δ::URA3 pRS316 [Myc-WT-PAH1 HIS3]</i>                          | This study       |
| <i>pah1Δ-K496/K801R-PAH1</i> | BY4741        | <i>MATa his3Δ1 leu2Δ met15Δ ura3 Δpah1Δ::URA3 pRS316 [Myc-K496/K801R-PAH1 HIS3]</i>                  | This study       |
